# Supplementary material for: Acute and postacute sequelae associated with SARS-CoV-2 reinfection
Source: Springer Nature journal article supplement (doi:10.1038/s41591-022-02051-3), 2022-11-01

---

# Acute and postacute sequelae associated with SARS-CoV-2 reinfection

---

In the format provided by the  
authors and unedited

## Supplementary Information

### Outcomes of SARS-CoV-2 Reinfection

| Table of Contents                                                                                                                                                                                                                                    | Page        |
|------------------------------------------------------------------------------------------------------------------------------------------------------------------------------------------------------------------------------------------------------|-------------|
| <b>Supplementary Figures</b>                                                                                                                                                                                                                         |             |
| <b>Supplementary Figure 1:</b> Standardized mean differences between SARS-CoV-2 reinfection and no reinfection before and after weighting.                                                                                                           | 2           |
| <b>Supplementary Figure 2:</b> Timeline of analyses for risk and burden assessment comparing reinfection to no reinfection.                                                                                                                          | 3           |
| <b>Supplementary Figure 3:</b> Timeline of analyses for risk and burden assessment by number of infections.                                                                                                                                          | 4           |
| <b>Supplementary Tables</b>                                                                                                                                                                                                                          |             |
| <b>Supplementary Table 1:</b><br>Demographic and health characteristics of those with non-infected control group, no SARS-CoV-2 reinfection, and SARS-CoV-2 reinfection.                                                                             | Excel sheet |
| <b>Supplementary Table 2:</b><br>Demographic and health characteristics by SARS-CoV-2 reinfection status after weighting.                                                                                                                            | Excel sheet |
| <b>Supplementary Table 3:</b><br>Risk and 6-month burden of death, hospitalization, at least one sequela, and sequelae by organ system in SARS-CoV-2 reinfection compared to those with no SARS-CoV-2 reinfection.                                   | Excel sheet |
| <b>Supplementary Table 4:</b><br>Risk and 6-month burden of death, hospitalization, at least one sequela, and sequelae by organ system in SARS-CoV-2 reinfection compared to no SARS-CoV-2 reinfection by vaccination status at time of reinfection. | Excel sheet |
| <b>Supplementary Table 5:</b><br>Risk and 6-month burden of death, hospitalization, at least one sequela, and sequelae by organ system in SARS-CoV-2 reinfection compared to no SARS-CoV-2 reinfection by time since reinfection.                    | Excel sheet |
| <b>Supplementary Table 6:</b><br>Demographic and health characteristics in those with one infection, two infections, three infections, and the non-infected control.                                                                                 | Excel sheet |
| <b>Supplementary Table 7:</b><br>Risk and one year burden of hospitalization, at least one sequela, and sequelae by organ system in those with one SARS-CoV-2 infection compared to the non-infected control.                                        | Excel sheet |
| <b>Supplementary Table 8:</b><br>Risk and one year burden of hospitalization, at least one sequela, and sequelae by organ system in those with two SARS-CoV-2 infections compared to the non-infected control.                                       | Excel sheet |
| <b>Supplementary Table 9:</b><br>Risk and one year burden of hospitalization, at least one sequela, and sequelae by organ system in those with three or more SARS-CoV-2 infections compared to the non-infected control.                             | Excel sheet |
| <b>Supplementary Table 10:</b><br>Risk and one year burden of hospitalization, at least one sequela, and sequelae by organ system in those with two SARS-CoV-2 infections compared to those with one SARS-CoV-2 infection.                           | Excel sheet |
| <b>Supplementary Table 11:</b><br>Risk and one year burden of hospitalization, at least one sequela, and sequelae by organ system in those with three or more SARS-CoV-2 infections compared to those with one SARS-CoV-2 infection.                 | Excel sheet |

|                                                                                                                                                                                                                                             |             |
|---------------------------------------------------------------------------------------------------------------------------------------------------------------------------------------------------------------------------------------------|-------------|
| <b><u>Supplementary Table 12</u></b><br>Risk and one year burden of hospitalization, at least one sequela, and sequelae by organ system in those with three or more SARS-CoV-2 infections compared to those with two SARS-CoV-2 infections. | Excel sheet |
| <b><u>Supplementary Table 13</u></b><br>Organ system disorder definitions                                                                                                                                                                   | Excel sheet |

**Supplementary Figure 1:** Standardized mean differences between SARS-CoV-2 reinfection and those without reinfection (only one infection) before and after weighting.

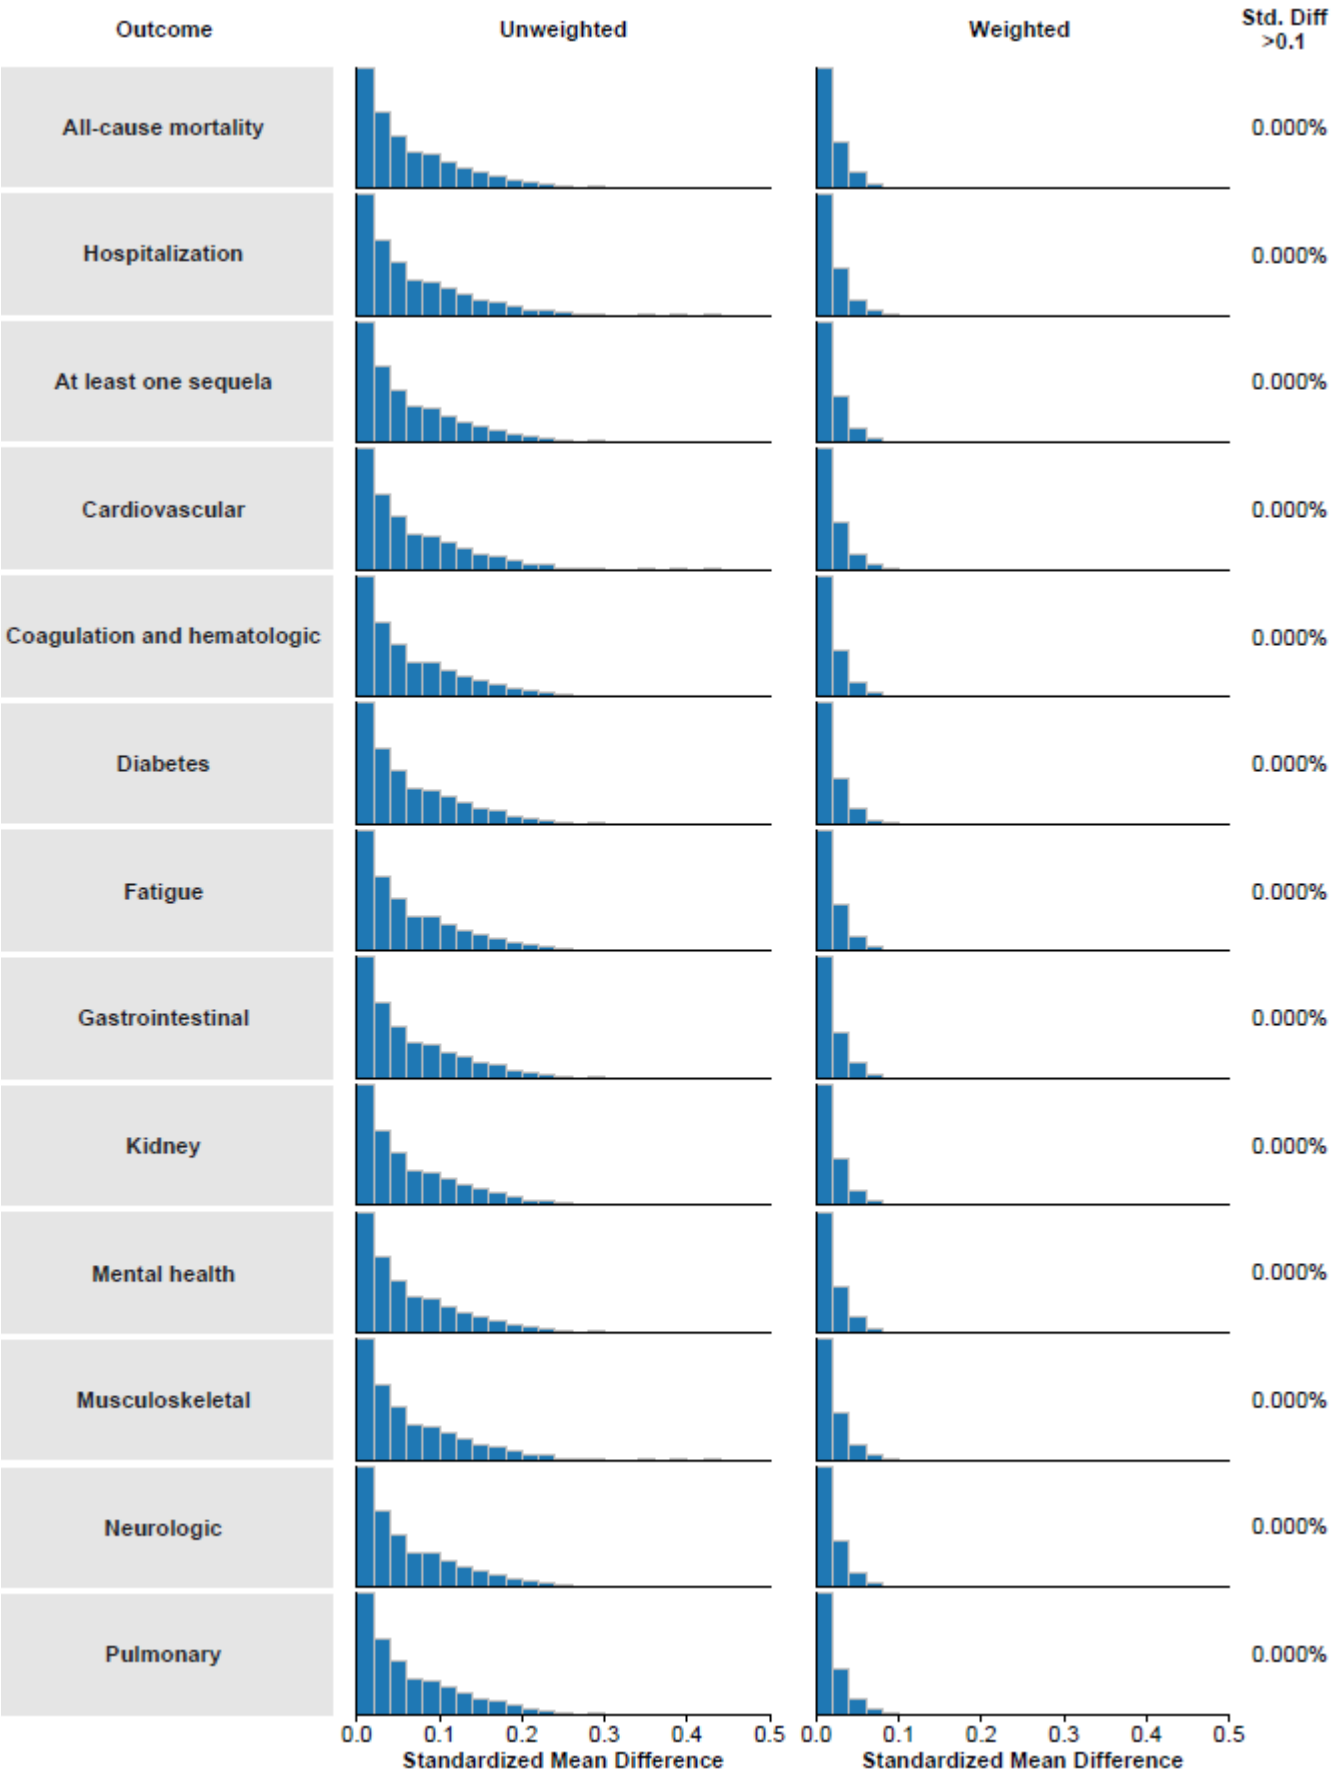

**Supplementary Figure 2:** Timeline of analyses for risk and burden assessment comparing reinfection to first infection. Timelines are plotted for the first infection and reinfection cohorts. Cohort participant characteristics were balanced at  $T_0$ , the date of their first infection. Risk and burdens were then estimated in the 180 days following  $T_1$ , the date of reinfection, in comparison to a similar  $T_1$  in the no reinfection group.

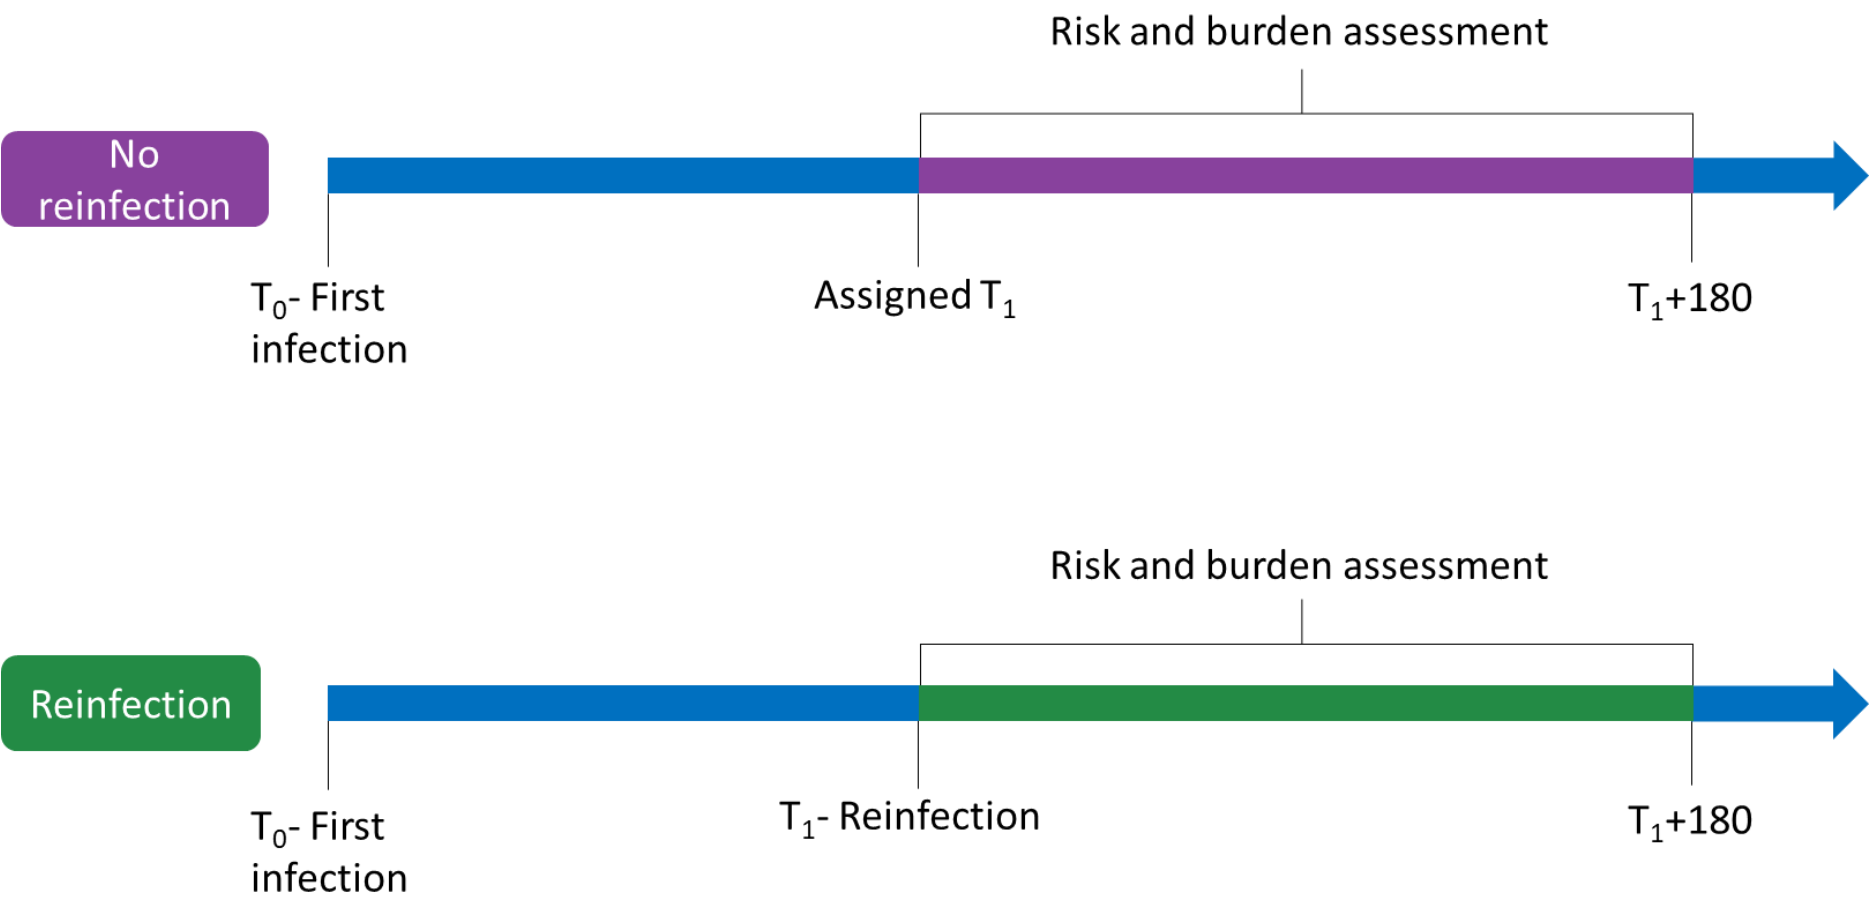

**Supplementary Figure 3:** Timeline of analyses for risk and burden assessment by number of infections. Timelines are plotted for the non-infected control, and in those with one, two, and three or more infections. Cohort participant characteristics were balanced at  $T_0$ , the date of their first infection or a randomly assigned  $T_0$  in the non-infected control group. Risk and burdens were then estimated in the 360 days following the acute phase of the first infection (or corresponding time in the non-infected control group).

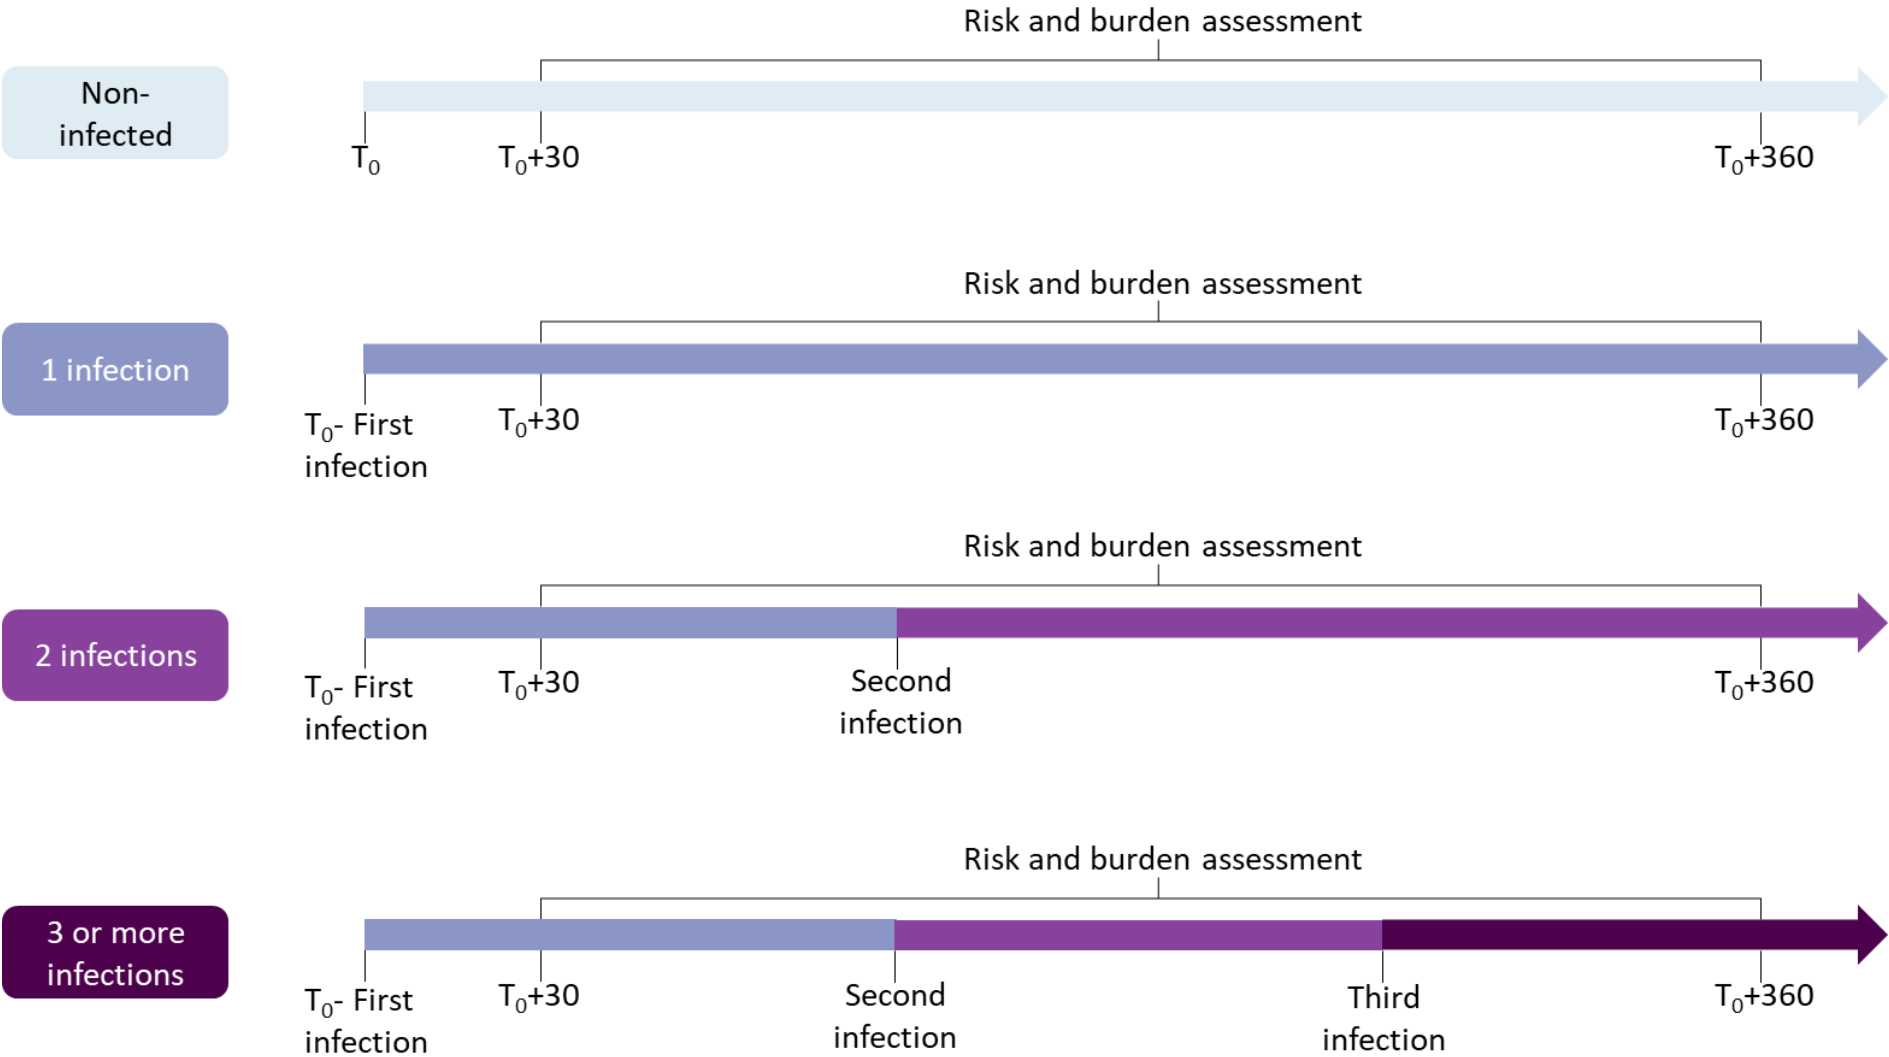

Supplement: MOESM1 [file 41591_2022_2051_MOESM1_ESM.pdf]
