# Supplementary material for: Acute and postacute sequelae associated with SARS-CoV-2 reinfection
Source: Nat Med. 2022 Nov 10;28(11):2398–405. doi: 10.1038/s41591-022-02051-3 (PMC9671810; doi:10.1038/s41591-022-02051-3)
Supplement: Supplementary file 3 — Supplementary Data Tables 1–13. [file 41591_2022_2051_MOESM3_ESM.xlsx]

## Sheet: Table of contents
Excel Sheet Table of Contents
Supplementary Table 1: Demographic and health characteristics of those with non-infected control group, no SARS-CoV-2 reinfection, and SARS-CoV-2 reinfection.
Supplementary Table 2: Demographic and health characteristics by SARS-CoV-2 reinfection status after weighting.
Supplementary Table 3 Risk and 6-month burden of death, hospitalization, at least one sequela, and sequelae by organ system in SARS-CoV-2 reinfection compared to those with no SARS-CoV-2 reinfection.
Supplementary Table 4: Risk and 6-month burden of death, hospitalization, at least one sequela, and sequelae by organ system in SARS-CoV-2 reinfection compared to no SARS-CoV-2 reinfection by vaccination status at time of reinfection.
Supplementary Table 5: Risk and 6-month burden of death, hospitalization, at least one sequela, and sequelae by organ system in SARS-CoV-2 reinfection compared to no SARS-CoV-2 reinfection by time since reinfection.
Supplementary Table 6: Demographic and health characteristics in those with one infection, two infections, three infections, and the non-infected control.
Supplementary Table 7 Risk and one year burden of hospitalization, at least one sequela, and sequelae by organ system in those with one SARS-CoV-2 infection compared to the non-infected control.
Supplementary Table 8 Risk and one year burden of hospitalization, at least one sequela, and sequelae by organ system in those with two SARS-CoV-2 infections compared to the non-infected control.
Supplementary Table 9 Risk and one year burden of hospitalization, at least one sequela, and sequelae by organ system in those with three or more SARS-CoV-2 infections compared to the non-infected control.
Supplementary Table 10 Risk and one year burden of hospitalization, at least one sequela, and sequelae by organ system in those with two SARS-CoV-2 infections compared to those with one SARS-CoV-2 infection.
Supplementary Table 11 Risk and one year burden of hospitalization, at least one sequela, and sequelae by organ system in those with three or more SARS-CoV-2 infections compared to those with one SARS-CoV-2 infection.
Supplementary Table 12 Risk and one year burden of hospitalization, at least one sequela, and sequelae by organ system in those with three or more SARS-CoV-2 infections compared to those with two SARS-CoV-2 infections.
Supplementary Table 13 Organ system disorder definitions

## Sheet: Supplementary Table 1
Supplementary Table 1: Demographic and health characteristics of those with non-infected control group, no SARS-CoV-2 reinfection, and SARS-CoV-2 reinfection.
Characteristic	Non-infected control (N=5,334,729)	No reinfection (N=443,588)	Reinfection (N=40,947)
Age (years), mean (SD)	63.46 (16.56)	60.01 (15.82)	60.12 (15.54)
Race, N (%)
White	3859677 (72.35)	310689 (70.04)	26185 (63.95)
Black	947981 (17.77)	95460 (21.52)	11183 (27.31)
Other	527071 (9.88)	37439 (8.44)	3579 (8.74)
Sex, N (%)
Male	4806591 (90.1)	387607 (87.38)	35493 (86.68)
Female	528138 (9.9)	55981 (12.62)	5454 (13.32)
ADI, mean SD	53.23 (18.76)	53.81 (18.24)	52.23 (18.67)
Smoking status, N (%)
Never	2460911 (46.13)	201167 (45.35)	19024 (46.46)
Former	1541203 (28.89)	135028 (30.44)	12415 (30.32)
Current	1332615 (24.98)	107393 (24.21)	9508 (23.22)
Long-term care, N (%)	39477 (0.74)	11666 (2.63)	2768 (6.76)
Systolic blood pressure (mmHg), mean (SD)	131.79 (16.38)	132.38 (17.95)	132.6 (18.69)
Diastolic blood pressure, (mmHg) mean (SD)	77.14 (9.74)	78.48 (10.81)	78.45 (11.25)
Estimated glomerular filtration rate (mL/min/1.73m2), mean (SD)	78.68 (19.56)	79.78 (21.47)	78.75 (23.30)
BMI, mean (SD)	29.93 (5.33)	31.01 (6.05)	30.95 (6.19)
Immunocompromised status, N (%)	136569 (2.56)	19474 (4.39)	3206 (7.83)
Cerebrovascular disease, N (%)	297678 (5.58)	34689 (7.82)	4459 (10.89)
Cancer, N(%)	112029 (2.1)	14062 (3.17)	1802 (4.40)
Anxiety, N (%)	507333 (9.51)	66893 (15.08)	8890 (21.71)
Chronic kidney disease, N (%)	432647 (8.11)	49194 (11.09)	6302 (15.39)
Cardiovascular disease, N (%)	770868 (14.45)	81620 (18.4)	9819 (23.98)
Dementia, N (%)	196318 (3.68)	25950 (5.85)	3902 (9.53)
Depression, N (%)	504132 (9.45)	67558 (15.23)	8460 (20.66)
Diabetes mellitus type 2, N (%)	1331015 (24.95)	141371 (31.87)	14802 (36.15)
Lung disease, N (%)	669508 (12.55)	76741 (17.3)	9201 (22.47)
Peripheral artery disease, N (%)	71485 (1.34)	9315 (2.1)	1368 (3.34)
Receipt of seasonal influenza vaccine in the 2 years prior, N (%)	2073076 (38.86)	216604 (48.83)	24626 (60.14)
Number of inpatient visits, mean (SD)	0.13 (0.61)	0.34 (1.18)	0.82 (2.06)
Number of outpatient visits, mean (SD)	2.52 (1.54)	3.47 (1.6)	4.17 (1.73)
Number of blood chemistry panels, mean (SD)	2.7 (4.33)	4.7 (7.38)	8.2 (12.88)
Number of unique medications, mean (SD)	8.03 (8.21)	12.58 (9.63)	16 (11.18)
Week of enrollment, mean (SD)**	75.29 (28.65)	78.51 (27.60)	47.90 (22.91)
Average duration of follow-up, mean (SD)	110.80 (69.75)	104.93 (69.98)	157.89 (46.80)
Time between infections, mean (SD)	192.37 (113.68)	187.04 (108.69)	240.94 (142.08)
HHS region SARS-CoV-2 variant Delta proportion*, mean (SD)	NA	0.24 (0.4)	0.11 (0.3)
HHS region SARS-CoV-2 variant Omicron proportion*, mean (SD)	NA	0.33 (0.45)	0.03 (0.16)
Number of inpatient medicare usage, mean (SD)	0.04 (0.2)	0.03 (0.18)	0.04 (0.2)
Number of outpatient medicare usage, mean (SD)	0.16 (0.36)	0.09 (0.29)	0.07 (0.26)
Vaccination
No vaccination, N (%)	3262719 (61.16)	275690 (62.15)	35657 (87.08)
One vaccination, N (%)	376098 (7.05)	37128 (8.37)	1552 (3.79)
Two vaccinations, N (%)	1177908 (22.08)	93508 (21.08)	3263 (7.97)
Three or more vaccinations, N (%)	518002 (9.71)	37261 (8.4)	475 (1.16)
Average hospital bed capacity*, mean (SD)	0.42 (0.14)	0.42 (0.14)	0.42 (0.14)
Total bed capacity*, mean (SD)	466.25 (299.06)	473.62 (301.26)	491.82 (304.64)
Hospitalization during acute phase of first infection, N (%)	NA	39036 ( 8.8 )	7280 ( 17.78 )
Admittance to intensive care unit during acute phase of first infection, N (%)	NA	10025 ( 2.26 )	1978 ( 4.83 )
COVID Treatment, Immunomudulators, N (%)	NA	54606 ( 12.31 )	7051 ( 17.22 )
COVID Treatment, Antivirals, N (%)	NA	21337 ( 4.81 )	2686 ( 6.56 )
COVID Treatment, Antibodies, N (%)	NA	6831 ( 1.54 )	446 ( 1.09 )
Characteristics assessed in the two years prior to testing positive for SARS-CoV-2 infection, or equivalent T0. N, sample size; SD, standard deviation; ADI, Area Deprivation Index; BMI, body mass index; HHS, US Department of Health and Human Services. * Measured in the week of cohort enrollment ** Week of enrollment calculated by week difference since start of open enrollment at March 1st 2020 an…

## Sheet: Supplementary Table 2
Supplementary Table 2: Demographic and health characteristics by SARS-CoV-2 reinfection status after weighting.
Characteristic	No Reinfection (N=443,588)	Reinfection (N=40,947)	Standardized Mean Difference (SMD)
Age (years), mean (SD)	59.84 (15.74)	59.97 (15.76)	0.008
Race, N (%)
White	308471 (69.54)	28302 (69.12)	0.009
Black	97767 (22.04)	9148 (22.34)	0.007
Other	37350 (8.42)	3497 (8.54)	0.004
Sex, N (%)
Male	386897 (87.22)	35378 (86.4)	0.024
Female	56691 (12.78)	5569 (13.6)	0.024
ADI, mean SD	53.68 (18.28)	53.37 (18.64)	0.017
Smoking status, N (%)
Never	202054 (45.55)	19044 (46.51)	0.019
Former	134585 (30.34)	12186 (29.76)	0.013
Current	106949 (24.11)	9717 (23.73)	0.009
Long-term care, N (%)	12332 (2.78)	1433 (3.5)	0.041
Systolic blood pressure (mmHg), mean (SD)	132.41 (17.97)	132.75 (18.3)	0.019
Diastolic blood pressure, (mmHg) mean (SD)	78.53 (10.82)	78.61 (10.91)	0.007
Estimated glomerular filtration rate (mL/min/1.73m2), mean (SD)	79.88 (21.49)	79.40 (22.07)	0.022
BMI, mean (SD)	31.04 (6.05)	30.97 (6.1)	0.011
Immunocompromised status, N (%)	20316 ( 4.58 )	1998 ( 4.88 )	0.014
Cerebrovascular disease, N (%)	35088 (7.91)	3571 (8.72)	0.029
Anxiety, N (%)	68845 (15.52)	6687 (16.33)	0.022
Cancer, N (%)	14106 (3.18)	1478 (3.61)	0.024
Chronic kidney disease, N (%)	49726 (11.21)	5122 (12.51)	0.04
Cardiovascular disease, N (%)	82241 (18.54)	8067 (19.7)	0.03
Dementia, N (%)	26305 (5.93)	2768 (6.76)	0.034
Depression, N (%)	69377 (15.64)	6695 (16.35)	0.019
Diabetes mellitus type 2, N (%)	141859 (31.98)	13316 (32.52)	0.012
Lung disease, N (%)	77761 (17.53)	7530 (18.39)	0.022
Peripheral artery disease, N (%)	9582 (2.16)	1011 (2.47)	0.021
Receipt of seasonal influenza vaccine in the 2 years prior, N (%)	220108 (49.62)	20809 (50.82)	0.024
Number of inpatient visits, mean (SD)	0.37 (1.27)	0.48 (1.48)	0.08
Number of outpatient visits, mean (SD)	3.52 (1.61)	3.62 (1.68)	0.059
Number of blood chemistry panels, mean (SD)	4.91 (7.88)	5.68 (9.03)	0.092
Number of unique medications, mean (SD)	12.80 ( 9.76 )	13.28 ( 10.27 )	0.048
Week of enrollment**, mean (SD)	75.08 ( 28.81 )	76.15 ( 28.49 )	0.038
Time between infections, mean (SD)	190.27 ( 111.73 )	193.39 ( 113.74 )	0.028
HHS region SARS-CoV-2 variant Delta proportion*, mean (SD)	0.23 (0.4)	0.23 (0.39)	0.014
HHS region SARS-CoV-2 variant Omicron proportion*, mean (SD)	0.31 (0.45)	0.29 (0.44)	0.037
Number of inpatient medicare usage, mean (SD)	0.05 (0.35)	0.05 (0.36)	0.001
Number of outpatient medicare usage, mean (SD)	0.18 (0.7)	0.16 (0.66)	0.023
Vaccination
No vaccination, N (%)	284517 ( 64.14 )	25707 ( 62.78 )	0.028
One vaccination, N (%)	35443 ( 7.99 )	3079 ( 7.52 )	0.018
Two vaccinations, N (%)	88762 ( 20.01 )	9369 ( 22.88 )	0.07
Three or more vaccinations, N (%)	34866 ( 7.86 )	2793 ( 6.82 )	0.04
Hospitalization during acute phase of first infection, N (%)	42318 ( 9.54 )	4844 ( 11.83 )	0.074
Admittance to intensive care unit during acute phase of first infection, N (%)	10957 ( 2.47 )	1163 ( 2.84 )	0.023
Average hospital bed capacity*, mean (SD)	0.42 (0.14)	0.42 (0.14)	0.013
Total bed capacity*, mean (SD)	474.99 (301.56)	485.31 (307.8)	0.034
COVID Treatment, Immunomudulators, N (%)	56380 ( 12.71 )	5933 ( 14.49 )	0.052
COVID Treatment, Antivirals, N (%)	21958 ( 4.95 )	2494 ( 6.09 )	0.05
COVID Treatment, Antibodies, N (%)	6654 ( 1.5 )	594 ( 1.45 )	0.004
Characteristics assessed in the two years prior to testing positive for SARS-CoV-2 infection, or equivalent T0. N, sample size; SD, standard deviation; ADI, Area Deprivation Index; BMI, body mass index; HHS, US Department of Health and Human Services. * Measured in the week of cohort enrollment ** Week of enrollment calculated by week difference since start of open enrollment at March 1st 2020 an…

## Sheet: Supplementary Table 3
Supplementary Table 3 Risk and 6-month burden of death, hospitalization, at least one sequela, and sequelae by organ system in SARS-CoV-2 reinfection compared to those with no SARS-CoV-2 reinfection.
Outcome	HR (95% CI)	Reinfection burden per 1000 persons at 6-months (95% CI)	No reinfection burden per 1000 persons at 6-months (95% CI)	Excess burden per 1000 persons at 6-months (95% CI)
All-cause mortality	2.17 (1.93, 2.45)	36.10 (32.10, 40.59)	16.77 (14.90, 18.88)	19.33 (15.34, 23.82)
Hospitalization	3.32 (3.13, 3.51)	147.02 (139.35, 155.07)	46.82 (44.25, 49.55)	100.19 (92.53, 108.25)
At least one sequela	2.10 (2.04, 2.16)	556.69 (546.32, 567.11)	320.78 (313.27, 328.42)	235.91 (225.54, 246.34)
Cardiovascular	3.02 (2.80, 3.26)	95.42 (88.78, 102.52)	32.61 (30.27, 35.13)	62.80 (56.17, 69.91)
Coagulation and hematologic	3.10 (2.77, 3.47)	50.38 (45.08, 56.28)	16.53 (14.77, 18.51)	33.85 (28.55, 39.74)
Diabetes	1.70 (1.41, 2.05)	15.78 (13.09, 19.02)	9.32 (7.73, 11.24)	6.46 (3.77, 9.69)
Fatigue	2.33 (2.14, 2.53)	83.84 (77.38, 90.81)	36.92 (34.01, 40.08)	46.92 (40.46, 53.89)
Gastrointestinal	2.48 (2.35, 2.62)	174.97 (166.55, 183.76)	74.67 (70.88, 78.66)	100.30 (91.88, 109.09)
Kidney	3.55 (3.18, 3.97)	53.74 (48.28, 59.80)	15.42 (13.83, 17.20)	38.31 (32.86, 44.37)
Mental health	2.14 (2.04, 2.24)	232.87 (223.46, 242.62)	116.74 (111.69, 122.02)	116.13 (106.71, 125.87)
Musculoskeletal	1.64 (1.49, 1.80)	66.91 (61.08, 73.27)	41.35 (37.71, 45.35)	25.55 (19.73, 31.91)
Neurologic	1.60 (1.51, 1.69)	148.23 (140.8, 156.02)	95.32 (90.40, 100.49)	52.91 (45.48, 60.70)
Pulmonary	3.54 (3.29, 3.82)	107.24 (99.98, 115.00)	31.50 (29.29, 33.89)	75.74 (68.47, 83.50)
Models were weighted for age, race, sex, ADI, the number in the two years prior to enrollment of outpatient visits, inpatient visits, unique medication prescriptions, and routine blood chemistry panels, utilization of Medicare, prior history of receiving an influenza vaccination, smoking status, anxiety, cancer, cardiovascular disease, cerebrovascular disease, chronic kidney disease, dementia, de…

## Sheet: Supplementary Table 4
Supplementary Table 4 Risk and 6-month burden of death, hospitalization, at least one sequela, and sequelae by organ system in SARS-CoV-2 reinfection compared to no SARS-CoV-2 reinfection by vaccination status at time of reinfection.
Outcome	No vaccination (N=202,404)	1 vaccination (N=56,986)	2 or more vaccinations (N=225,145)
	HR (95% CI)	HR (95% CI)	HR (95% CI)
All cause mortality	1.67 (1.50, 1.87)	2.25 (1.96, 2.58)	1.97 (1.71, 2.26)
Hospitalization	2.26 (2.11, 2.42)	2.37 (2.22, 2.52)	2.35 (2.19, 2.51)
At least one post-acute sequela	1.88 (1.82, 1.94)	1.89 (1.83, 1.95)	1.87 (1.81, 1.94)
Cardiovascular	2.43 (2.23, 2.65)	2.24 (2.07, 2.43)	2.44 (2.25, 2.66)
Coagulation and Hematologic	2.30 (2.04, 2.59)	2.39 (2.13, 2.68)	2.27 (2.01, 2.57)
Diabetes	1.51 (1.25, 1.82)	1.58 (1.30, 1.90)	1.45 (1.18, 1.79)
Fatigue	1.97 (1.80, 2.16)	2.16 (1.98, 2.36)	2.01 (1.83, 2.22)
Gastrointestinal	1.95 (1.84, 2.07)	2.07 (1.95, 2.20)	1.93 (1.81, 2.06)
Kidney	2.67 (2.36, 3.03)	2.68 (2.38, 3.01)	2.76 (2.44, 3.12)
Mental Health	1.94 (1.85, 2.04)	1.84 (1.75, 1.94)	1.80 (1.70, 1.91)
Musculoskeletal	1.39 (1.27, 1.53)	1.49 (1.36, 1.65)	1.42 (1.27, 1.58)
Neurologic	1.51 (1.42, 1.60)	1.47 (1.39, 1.56)	1.56 (1.46, 1.66)
Pulmonary	2.60 (2.40, 2.83)	2.47 (2.27, 2.68)	2.63 (2.41, 2.86)
Models were weighted for age, race, sex, ADI, the number in the two years prior to enrollment of outpatient visits, inpatient visits, unique medication prescriptions, and routine blood chemistry panels, utilization of Medicare, prior history of receiving an influenza vaccination, smoking status, anxiety, cancer, cardiovascular disease, cerebrovascular disease, chronic kidney disease, dementia, de…

## Sheet: Supplementary Table 5
Supplementary table 5 Risk and 6-month burden of death, hospitalization, at least one sequela, and sequelae by organ system in SARS-CoV-2 reinfection compared to no SARS-CoV-2 reinfection by time since reinfection.
Outcome	Period	HR	Reinfection burden per 1000 persons at 30 days	No reinfection burden per 1000 persons at 30 days	Excess burden per 1000 persons at 30 days
All cause mortality	1	3.76 (2.99, 4.73)	12.47 (9.93, 15.66)	3.33 (2.65, 4.19)	9.14 (6.60, 12.33)
	2	2.24 (1.75, 2.86)	6.89 (5.40, 8.79)	3.08 (2.41, 3.93)	3.81 (2.32, 5.71)
	3	1.52 (1.26, 1.83)	4.63 (3.84, 5.59)	3.06 (2.53, 3.69)	1.58 (0.79, 2.53)
	4	1.31 (1.07, 1.61)	3.88 (3.16, 4.77)	2.97 (2.42, 3.64)	0.92 (0.20, 1.80)
	5	1.35 (1.09, 1.67)	3.92 (3.17, 4.86)	2.90 (2.35, 3.60)	1.02 (0.27, 1.95)
	6	1.37 (1.08, 1.75)	3.73 (2.92, 4.76)	2.72 (2.13, 3.47)	1.01 (0.20, 2.04)
Hospitalization	1	7.40 (6.81, 8.04)	79.76 (73.64, 86.36)	11.16 (10.28, 12.13)	68.60 (62.48, 75.20)
	2	2.75 (2.44, 3.08)	31.35 (27.96, 35.14)	11.53 (10.27, 12.94)	19.81 (16.43, 23.60)
	3	1.94 (1.75, 2.16)	23.03 (20.75, 25.55)	11.92 (10.74, 13.24)	11.11 (8.83, 13.63)
	4	1.67 (1.51, 1.84)	19.16 (17.34, 21.17)	11.53 (10.43, 12.75)	7.63 (5.80, 9.64)
	5	1.61 (1.46, 1.78)	19.18 (17.38, 21.18)	11.97 (10.84, 13.22)	7.21 (5.41, 9.21)
	6	1.59 (1.43, 1.77)	18.93 (17.05, 21.01)	11.92 (10.73, 13.23)	7.01 (5.13, 9.09)
At least one sequela	1	3.08 (2.97, 3.19)	393.48 (383.10, 404.04)	149.98 (145.27, 154.81)	243.51 (233.13, 254.07)
	2	1.59 (1.53, 1.66)	237.38 (229.23, 245.78)	156.34 (150.70, 162.18)	81.04 (72.88, 89.43)
	3	1.44 (1.39, 1.49)	221.58 (214.82, 228.53)	159.95 (154.88, 165.17)	61.63 (54.87, 68.57)
	4	1.36 (1.31, 1.40)	216.07 (210.27, 222.01)	164.39 (159.83, 169.07)	51.68 (45.88, 57.62)
	5	1.27 (1.23, 1.31)	203.44 (197.86, 209.16)	164.14 (159.52, 168.87)	39.30 (33.72, 45.02)
	6	1.26 (1.22, 1.30)	204.78 (198.91, 210.80)	165.96 (161.09, 170.96)	38.82 (32.96, 44.84)
Cardiovascular	1	5.66 (5.16, 6.19)	69.26 (63.44, 75.58)	12.61 (11.52, 13.80)	56.65 (50.83, 62.97)
	2	2.19 (1.99, 2.41)	28.45 (25.86, 31.29)	13.08 (11.89, 14.40)	15.37 (12.78, 18.21)
	3	1.98 (1.78, 2.21)	26.37 (23.74, 29.28)	13.37 (12.03, 14.86)	12.99 (10.36, 15.91)
	4	1.66 (1.51, 1.82)	22.69 (20.66, 24.90)	13.76 (12.53, 15.11)	8.93 (6.91, 11.15)
	5	1.70 (1.55, 1.87)	22.73 (20.65, 25.01)	13.42 (12.19, 14.77)	9.31 (7.24, 11.59)
	6	1.59 (1.44, 1.76)	21.93 (19.83, 24.24)	13.84 (12.51, 15.31)	8.09 (5.99, 10.40)
Coagulation and Hematologic	1	5.86 (5.20, 6.60)	41.18 (36.64, 46.28)	7.15 (6.35, 8.06)	34.03 (29.48, 39.13)
	2	2.48 (2.14, 2.88)	17.56 (15.15, 20.35)	7.12 (6.14, 8.26)	10.44 (8.03, 13.22)
	3	1.89 (1.61, 2.21)	13.64 (11.67, 15.94)	7.24 (6.20, 8.47)	6.40 (4.43, 8.69)
	4	1.88 (1.65, 2.15)	13.51 (11.84, 15.41)	7.20 (6.31, 8.22)	6.31 (4.64, 8.21)
	5	1.71 (1.49, 1.96)	11.74 (10.24, 13.46)	6.90 (6.02, 7.91)	4.84 (3.34, 6.56)
	6	1.7 (1.47, 1.97)	11.68 (10.12, 13.49)	6.88 (5.95, 7.94)	4.81 (3.24, 6.61)
Diabetes	1	2.83 (2.44, 3.27)	30.96 (26.79, 35.75)	11.06 (9.56, 12.80)	19.9 (15.73, 24.69)
	2	1.65 (1.38, 1.99)	19.77 (16.47, 23.72)	11.99 (9.99, 14.40)	7.78 (4.48, 11.73)
	3	1.40 (1.19, 1.64)	18.46 (15.76, 21.61)	13.25 (11.31, 15.53)	5.21 (2.51, 8.36)
	4	1.25 (1.11, 1.42)	16.90 (14.93, 19.13)	13.49 (11.92, 15.28)	3.41 (1.43, 5.64)
	5	1.23 (1.08, 1.40)	17.44 (15.34, 19.83)	14.23 (12.51, 16.18)	3.21 (1.11, 5.6)
	6	1.32 (1.15, 1.50)	19.35 (16.97, 22.07)	14.73 (12.91, 16.80)	4.63 (2.24, 7.35)
Fatigue	1	6.99 (6.15, 7.95)	38.31 (33.78, 43.43)	5.57 (4.90, 6.33)	32.74 (28.22, 37.86)
	2	2.66 (2.17, 3.25)	13.66 (11.17, 16.7)	5.17 (4.22, 6.32)	8.50 (6.01, 11.54)
	3	1.85 (1.59, 2.14)	9.63 (8.29, 11.18)	5.23 (4.50, 6.07)	4.40 (3.06, 5.95)
	4	1.77 (1.51, 2.06)	10.07 (8.63, 11.75)	5.71 (4.89, 6.67)	4.36 (2.92, 6.04)
	5	1.56 (1.34, 1.82)	8.89 (7.62, 10.38)	5.71 (4.89, 6.66)	3.19 (1.91, 4.67)
	6	1.72 (1.46, 2.03)	8.74 (7.41, 10.31)	5.08 (4.31, 6.00)	3.66 (2.33, 5.23)
Gastrointestinal	1	5.11 (4.59, 5.69)	52.49 (47.27, 58.27)	10.50 (9.43, 11.68)	41.99 (36.77, 47.77)
	2	2.32 (1.99, 2.70)	24.21 (20.84, 28.12)	10.50 (9.03, 12.21)	13.71 (10.33, 17.62)
	3	1.72 (1.49, 1.99)	19.14 (16.57, 22.11)	11.15 (9.65, 12.89)	7.99 (5.42, 10.96)
	4	1.49 (1.32, 1.67)	17.12 (15.24, 19.23)	11.54 (10.27, 12.97)	5.58 (3.70, 7.69)
	5	1.36 (1.21, 1.52)	15.24 (13.57, 17.10)	11.26 (10.03, 12.64)	3.98 (2.31, 5.85)
	6	1.31 (1.16, 1.47)	14.31 (12.69, 16.15)	10.98 (9.73, 12.39)	3.33 (1.70, 5.16)
Kidney	1	3.92 (3.59, 4.28)	69.95 (64.25, 76.13)	18.34 (16.81, 20.02)	51.6 (45.91, 57.79)
	2	1.68 (1.52, 1.86)	32.10 (29.1, 35.41)	19.20 (17.39, 21.19)	12.91 (9.91, 16.22)
	3	1.42 (1.29, 1.55)	27.74 (25.36, 30.34)	19.65 (17.96, 21.50)	8.09 (5.71, 10.68)
	4	1.45 (1.34, 1.58)	28.51 (26.26, 30.95)	19.68 (18.13, 21.38)	8.83 (6.58, 11.26)
	5	1.38 (1.27, 1.50)	27.57 (25.41, 29.92)	20.06 (18.47, 21.77)	7.52 (5.35, 9.87)
	6	1.37 (1.25, 1.50)	27.79 (25.48, 30.31)	20.36 (18.66, 22.21)	7.43 (5.12, 9.95)
Mental Health	1	3.38 (3.20, 3.57)	162.89 (154.89, 171.25)	51.29 (48.61, 54.11)	111.60 (103.6, 119.96)
	2	1.75 (1.63, 1.87)	90.97 (85.28, 97.02)	53.06 (49.68, 56.67)	37.90 (32.21, 43.95)
	3	1.50 (1.42, 1.59)	82.10 (77.91, 86.50)	55.45 (52.59, 58.47)	26.64 (22.45, 31.04)
	4	1.39 (1.32, 1.46)	79.48 (75.70, 83.44)	57.96 (55.17, 60.88)	21.53 (17.75, 25.49)
	5	1.35 (1.29, 1.43)	77.99 (74.24, 81.91)	58.20 (55.38, 61.17)	19.78 (16.03, 23.71)
	6	1.27 (1.21, 1.34)	75.57 (71.79, 79.53)	59.91 (56.89, 63.09)	15.65 (11.87, 19.62)
Musculoskeletal	1	3.15 (2.82, 3.53)	51.65 (46.29, 57.61)	16.68 (14.92, 18.65)	34.96 (29.6, 40.92)
	2	1.74 (1.51, 2.00)	28.01 (24.37, 32.18)	16.23 (14.12, 18.67)	11.77 (8.14, 15.94)
	3	1.38 (1.20, 1.59)	23.03 (20.02, 26.48)	16.72 (14.54, 19.24)	6.31 (3.30, 9.76)
	4	1.30 (1.17, 1.44)	22.36 (20.23, 24.71)	17.25 (15.60, 19.07)	5.11 (2.98, 7.46)
	5	1.19 (1.07, 1.31)	19.90 (18.01, 21.98)	16.82 (15.22, 18.58)	3.08 (1.19, 5.17)
	6	1.23 (1.11, 1.37)	20.60 (18.54, 22.88)	16.79 (15.12, 18.66)	3.80 (1.75, 6.08)
Neurological	1	2.37 (2.18, 2.57)	67.59 (62.39, 73.21)	29.11 (26.82, 31.58)	38.48 (33.28, 44.11)
	2	1.42 (1.30, 1.56)	42.25 (38.67, 46.16)	29.92 (27.37, 32.70)	12.34 (8.76, 16.24)
	3	1.35 (1.25, 1.46)	40.18 (37.17, 43.41)	29.96 (27.71, 32.39)	10.21 (7.21, 13.45)
	4	1.37 (1.28, 1.47)	42.51 (39.73, 45.49)	31.26 (29.20, 33.47)	11.25 (8.46, 14.23)
	5	1.23 (1.15, 1.33)	38.03 (35.44, 40.80)	30.93 (28.82, 33.20)	7.10 (4.50, 9.87)
	6	1.27 (1.18, 1.37)	39.84 (37.03, 42.86)	31.50 (29.27, 33.90)	8.34 (5.53, 11.36)
Pulmonary	1	7.42 (6.83, 8.07)	78.97 (72.91, 85.51)	11.02 (10.14, 11.97)	67.95 (61.89, 74.49)
	2	2.03 (1.77, 2.32)	22.50 (19.67, 25.73)	11.16 (9.75, 12.77)	11.34 (8.52, 14.57)
	3	1.58 (1.4, 1.79)	17.35 (15.37, 19.58)	11.01 (9.75, 12.43)	6.34 (4.36, 8.57)
	4	1.40 (1.25, 1.57)	15.83 (14.12, 17.74)	11.33 (10.11, 12.71)	4.49 (2.79, 6.41)
	5	1.40 (1.24, 1.57)	14.83 (13.20, 16.66)	10.65 (9.48, 11.96)	4.18 (2.56, 6.01)
	6	1.34 (1.19, 1.51)	14.81 (13.15, 16.68)	11.04 (9.80, 12.44)	3.77 (2.11, 5.64)
Models were weighted for age, race, sex, ADI, the number in the two years prior to enrollment of outpatient visits, inpatient visits, unique medication prescriptions, and routine blood chemistry panels, utilization of Medicare, prior history of receiving an influenza vaccination, smoking status, anxiety, cancer, cardiovascular disease, cerebrovascular disease, chronic kidney disease, dementia, de…

## Sheet: Supplementary Table 6
Supplementary Table 6: Demographic and health characteristics of those with one SARS-CoV-2 infection, two SARS-CoV-2 infections, three or more SARS-CoV-2 infections, and the non-infected control group.
Characteristic	No infection (N=5,334,729)	One Infection (N=234,990)	Two infections (N=28,509)	Three or more infections (N=1,023)
Age (years), mean (SD)	63.46 (16.56)	60.12 (15.84)	61.19 (15.41)	64.68 (13.80)
Race, N (%)
White	3859677 (72.35)	168629 (71.76)	18413 (64.59)	624 (61.00)
Black	947981 (17.77)	47280 (20.12)	7628 (26.76)	293 (28.64)
Other	527071 (9.88)	19081 (8.12)	2468 (8.66)	106 (10.36)
Sex, N (%)
Male	4806591 (90.10)	207171 (88.16)	24899(87.34)	923 (90.22)
Female	528138 (9.90)	27819 (11.84)	3610 (12.66)	100 (9.78)
ADI, mean SD	53.23 (18.76)	54.45 (1.58)	52.52 (18.70)	46.77 (21.19)
Smoking status, N (%)
Never	2460919 (46.13)	106094 (45.15)	12942 (45.40)	421 (41.14)
Former	1541203 (28.89)	73613(31.33)	8907(31.24)	326 (31.87)
Current	1332615 (24.98)	55283 (23.53)	6660 (23.36)	276 (26.98)
Long-term care, N (%)	39477 (0.74)	5976 (2.54)	2039 (7.15)	149 (14.57)
Systolic blood pressure (mmHg), mean (SD)	131.79 (16.38)	132.18 (17.81)	132.55 (18.90)	133.21 (20.54)
Diastolic blood pressure, (mmHg) mean (SD)	77.14 (9.74)	78.35 (10.78)	78.15 (11.29)	76.86 (11.76)
Estimated glomerular filtration rate (mL/min/1.73m2), mean (SD)	79.78 (19.56)	79.62 (21.26)	77.88 (23.32)	71.52 (28.42)
BMI, mean (SD)	29.93 (5.33)	31.15 (6.05)	30.90 (6.20)	29.97 (6.50)
Immunocompromised status, N (%)	136569 (2.56)	10021 (4.26)	2259 (7.92)	169 (16.52)
Cerebrovascular disease, N (%)	297678 (5.58)	17884 (7.61)	3291 (11.54)	185 (18.08)
Cancer, N (%)	112029 (2.10)	6986 (2.97)	1334 (4.71)	68 (6.65)
Anxiety, N (%)	507333 (9.51)	34060 (14.49)	6187 (21.70)	354 (34.60)
Chronic kidney disease, N (%)	432647 (8.11)	25540 (10.87)	4575 (16.05)	295 (28.84)
Cardiovascular disease, N (%)	770868 (14.45)	43073 (18.33)	7239 (25.39)	373 (36.36)
Dementia, N (%)	196318 (3.68)	13115 (5.58)	2859 (10.03)	180 (17.60)
Depression, N (%)	504132 (9.45)	35115 (14.94)	5779 (20.27)	286 (27.96)
Diabetes mellitus type 2, N (%)	1331015 (24.95)	75883 (32.29)	10674 (37.44)	460 (44.97)
Lung disease, N (%)	669508 (12.55)	40253 (17.13)	6556 (23.00)	326 (31.87)
Peripheral artery disease, N (%)	71485 (1.34)	4796 (2.04)	1002 (3.51)	60 (5.87)
Receipt of seasonal influenza vaccine in the 2 years prior, N (%)	2073076 (38.86)	119047 (50.66)	17495 (61.37)	682 (66.67)
Number of inpatient visits, mean (SD)	0.13 (0.61)	0.32 (1.14)	0.81 (2.00)	2.24 (3.86)
Number of outpatient visits, mean (SD)	2.52 (1.54)	3.43 (1.58)	4.19 (1.72)	4.98 (1.91)
Number of blood chemistry panels, mean (SD)	2.7 (4.33)	4.57 (6.95)	8.25 (12.69)	18.23 (24.05)
Number of unique medications, mean (SD)	8.03 (8.21)	12.37 (9,49)	16.24 (11.12)	20.43 (13.81)
Week of enrollment, mean (SD)	75.29 (28.65)	67.46 (23.46)	47.72 (6.19)	48.67 (23.05)
Time between infections, mean (SD)	192.37 (113.68)	167.81 (63.58)	174.54 (66.46)	134.11 (38.90)
HHS region SARS-CoV-2 variant Delta proportion*, mean (SD)	NA	0.43 (64.58)	0.15 (0.34)	0.12 (0.30)
HHS region SARS-CoV-2 variant Omicron proportion*, mean (SD)	NA	0 (0.00)	0 (0.00)	0 (0.00)
Number of inpatient medicare usage, mean (SD)	0.04 (0.20)	0.05 (0.36)	0.07 (0.52)	0.11 (0.67)
Number of outpatient medicare usage, mean (SD)	0.16 (0.36)	0.20 (0.74)	0.15 (0.60)	0.13 (0.55)
Vaccination
No vaccination, N (%)	3262719 (61.16)	171730 (73.08)	24718 (86.70)	717 (70.09)
One vaccination, N (%)	376098 (7.05)	17742 (7.55)	1100 (3.86)	80 (7.82)
Two vaccinations, N (%)	1177908 (22.08)	42651 (18.15)	2540 (8.91)	224 (21.90)
Three or more vaccinations, N (%)	518002 (9.71)	2867 (1.22)	151 (0.53)	2 (0.20)
Average hospital bed occupancy*, mean (SD)	0.42 (0.14)	0.42 (0.14)	0.43 (0.14)	0.44 (0.14)
Total bed capacity*, mean (SD)	466.25 (299.06)	473.51 (303.55)	493.38 (304.85)	528.40 (324.45)
Hospitalization during acute phase of first infection, N (%)	NA	29631 (12.61)	6829 (23.95)	428 (41.84)
Admittance to intensive care unit during acute phase of first infection, N (%)	NA	6406 (2.73)	1481 (5.19)	81 (7.92)
COVID Treatment, Immunomudulators, N (%)	NA	5976 (2.54)	2039 (7.15)	149 (14.57)
COVID Treatment, Antivirals, N (%)	NA	33542 (14.27)	1997 (7.00)	49 (4.79)
COVID Treatment, Antibodies, N (%)	NA	4920 (2.09)	364 (1.28)	13 (1.27)
Characteristics assessed in the two years prior to testing positive for SARS-CoV-2 infection, or equivalent T0. As those with 3 or more infections predominantly had their first infection before the omicron variant was present, to enhance comparison across groups, we restricted this analysis to those with a T0 period prior to when omicron became the predominant variant in at least one HHS region (…

## Sheet: Supplementary Table 7
Supplementary Table 7 Risk and one year burden of hospitalization, at least one sequela, and sequelae by organ system in those with one SARS-CoV-2 infection compared to the non-infected control.
Outcome	HR (95% CI)	One infection burden per 1000 persons at one year (95% CI)	No infection burden per 1000 persons at one year (95% CI)	Excess burden per 1000 persons at one year (95% CI)
Hospitalization	1.42 (1.39, 1.46)	88.43 (86.57, 90.33)	62.98 (61.64, 64.35)	25.45 (23.59, 27.34)
At least one sequela	1.37 (1.36, 1.38)	564.62 (561.63, 567.62)	455.74 (453.01, 458.49)	108.88 (105.89, 111.87)
Cardiovascular	1.57 (1.53, 1.60)	80.37 (78.62, 82.16)	52.07 (50.92, 53.25)	28.30 (26.55, 30.09)
Coagulation and Hematologic	1.64 (1.59, 1.69)	50.47 (49.06, 51.92)	31.14 (30.26, 32.05)	19.33 (17.91, 20.78)
Diabetes	1.36 (1.31, 1.40)	36.81 (35.65, 38.02)	27.25 (26.39, 28.15)	9.56 (8.39, 10.76)
Fatigue	1.45 (1.42, 1.48)	86.96 (85.18, 88.78)	60.96 (59.69, 62.25)	26.01 (24.23, 27.82)
Gastrointestinal	1.30 (1.28, 1.33)	157.28 (155.00, 159.60)	122.93 (121.11, 124.78)	34.35 (32.07, 36.67)
Kidney	1.39 (1.35, 1.44)	42.81 (41.48, 44.18)	30.95 (29.99, 31.95)	11.86 (10.53, 13.23)
Mental Health	1.29 (1.28, 1.31)	233.16 (230.53, 235.80)	185.42 (183.27, 187.59)	47.74 (45.11, 50.38)
Musculoskeletal	1.24 (1.21, 1.27)	86.89 (85.15, 88.66)	70.73 (69.30, 72.18)	16.16 (14.42, 17.93)
Neurologic	1.27 (1.25, 1.29)	183.96 (181.54, 186.4)	147.62 (145.64, 149.63)	36.33 (33.92, 38.78)
Pulmonary	1.92 (1.87, 1.96)	92.47 (90.58, 94.40)	49.39 (48.36, 50.44)	43.08 (41.19, 45.01)
Models were weighted for age, race, sex, ADI, the number in the two years prior to enrollment of outpatient visits, inpatient visits, unique medication prescriptions, and routine blood chemistry panels, utilization of Medicare, prior history of receiving an influenza vaccination, smoking status, anxiety, cancer, cardiovascular disease, cerebrovascular disease, chronic kidney disease, dementia, de…

## Sheet: Supplementary Table 8
Supplementary Table 8 Risk and one year burden of hospitalization, at least one sequela, and sequelae by organ system in those with two SARS-CoV-2 infections compared to the non-infected control.
Outcome	HR (95% CI)	Two infections burden per 1000 persons at one year (95% CI)	Non-infected burden per 1000 persons at one year (95% CI)	Excess burden per 1000 persons at one year (95% CI)
Hospitalization	4.49 (4.36, 4.63)	253.44 (247.06, 259.96)	62.98 (61.64, 64.35)	190.46 (184.08, 196.98)
At least one sequela	2.07 (2.03, 2.11)	716.16 (709.45, 722.83)	455.74 (453.01, 458.49)	260.41 (253.70, 267.09)
Cardiovascular	3.01 (2.90, 3.13)	148.86 (143.75, 154.13)	52.07 (50.92, 53.25)	96.79 (91.68, 102.06)
Coagulation and Hematologic	3.03 (2.89, 3.18)	91.41 (87.29, 95.72)	31.14 (30.26, 32.05)	60.27 (56.15, 64.58)
Diabetes	2.09 (1.96, 2.23)	56.18 (52.85, 59.71)	27.25 (26.39, 28.15)	28.92 (25.59, 32.46)
Fatigue	2.51 (2.41, 2.61)	145.94 (140.77, 151.28)	60.96 (59.69, 62.25)	84.98 (79.81, 90.33)
Gastrointestinal	2.40 (2.33, 2.46)	269.62 (263.12, 276.26)	122.93 (121.11, 124.78)	146.69 (140.18, 153.32)
Kidney	2.98 (2.83, 3.13)	89.45 (85.24, 93.85)	30.95 (29.99, 31.95)	58.50 (54.29, 62.90)
Mental Health	2.10 (2.05, 2.15)	350.08 (343.06, 357.20)	185.42 (183.27, 187.59)	164.66 (157.64, 171.78)
Musculoskeletal	1.55 (1.48, 1.62)	107.38 (102.81, 112.13)	70.73 (69.30, 72.18)	36.65 (32.08, 41.40)
Neurologic	1.79 (1.74, 1.84)	248.80 (242.53, 255.21)	147.62 (145.64, 149.63)	101.18 (94.90, 107.59)
Pulmonary	3.61 (3.48, 3.75)	167.17 (161.64, 172.88)	49.39 (48.36, 50.44)	117.78 (112.25, 123.49)
Models were weighted for age, race, sex, ADI, the number in the two years prior to enrollment of outpatient visits, inpatient visits, unique medication prescriptions, and routine blood chemistry panels, utilization of Medicare, prior history of receiving an influenza vaccination, smoking status, anxiety, cancer, cardiovascular disease, cerebrovascular disease, chronic kidney disease, dementia, de…

## Sheet: Supplementary Table 9
Supplementary Table 9 Risk and one year burden of hospitalization, at least one sequela, and sequelae by organ system in those with three or more SARS-CoV-2 infections compared to the non-infected control.
Outcome	HR (95% CI)	Three or more infections burden per 1000 persons at one year (95% CI)	Non-infected burden per 1000 persons at one year (95% CI)	Excess burden per 1000 persons at one year (95% CI)
Hospitalization	7.75 (6.77, 8.86)	395.81 (356.16, 438.21)	62.98 (61.64, 64.35)	332.83 (293.17, 375.22)
At least one sequela	2.35 (2.12, 2.62)	761.18 (723.81, 796.86)	455.74 (453.01, 458.49)	305.44 (268.07, 341.11)
Cardiovascular	4.81 (4.05, 5.71)	226.63 (194.65, 262.96)	52.07 (50.92, 53.25)	174.56 (142.57, 210.89)
Coagulation and Hematologic	4.48 (3.57, 5.62)	132.12 (106.82, 162.84)	31.14 (30.26, 32.05)	100.97 (75.68, 131.69)
Diabetes	2.93 (2.18, 3.93)	77.78 (58.57, 102.95)	27.25 (26.39, 28.15)	50.53 (31.31, 75.69)
Fatigue	3.49 (2.90, 4.22)	197.26 (166.50, 232.87)	60.96 (59.69, 62.25)	136.31 (105.54, 171.92)
Gastrointestinal	3.48 (3.02, 4.01)	366.56 (326.90, 409.41)	122.93 (121.11, 124.78)	243.63 (203.97, 286.48)
Kidney	5.22 (4.21, 6.49)	151.45 (123.87, 184.49)	30.95 (29.99, 31.95)	120.49 (92.91, 153.54)
Mental Health	2.59 (2.26, 2.97)	411.99 (370.87, 455.81)	185.42 (183.27, 187.59)	226.57 (185.45, 270.39)
Musculoskeletal	1.85 (1.44, 2.38)	127.05 (100.31, 160.25)	70.73 (69.30, 72.18)	56.32 (29.59, 89.53)
Neurologic	2.41 (2.08, 2.81)	320.01 (282.15, 361.54)	147.62 (145.64, 149.63)	172.38 (134.53, 213.92)
Pulmonary	4.44 (3.68, 5.36)	201.42 (169.88, 237.93)	49.39 (48.36, 50.44)	152.03 (120.49, 188.54)
Models were weighted for age, race, sex, ADI, the number in the two years prior to enrollment of outpatient visits, inpatient visits, unique medication prescriptions, and routine blood chemistry panels, utilization of Medicare, prior history of receiving an influenza vaccination, smoking status, anxiety, cancer, cardiovascular disease, cerebrovascular disease, chronic kidney disease, dementia, de…

[truncated: 4 more sheets: Supplementary Table 10, Supplementary Table 11, Supplementary Table 12, Supplementary Table 13]
